# Supplementary material
Source: PubMed Central journal article supplement (PMC8670447)
Supplement: pnas.2106459118.sapp.pdf [file pnas.2106459118.sapp.pdf]

## Supplementary Information for

Nanchung and inactive define pore properties of the native auditory transduction channel in *Drosophila*

Bingxue Li<sup>a,b,1</sup>, Songling Li<sup>a,b,1</sup>, Honglan Zheng<sup>a,b</sup>, Zhiqiang Yan<sup>a,b,2</sup>

<sup>a</sup>State Key Laboratory of Medical Neurobiology and MOE Frontiers Center for Brain Science, Institute of Brain Science, School of Life Sciences, Fudan University, Shanghai 200438, China.

<sup>b</sup>Institute of Molecular Physiology, Shenzhen Bay Laboratory, Shenzhen 518132, China.

<sup>1</sup>These authors contributed equally to this work.

<sup>2</sup>Correspondence to: Zhiqiang Yan  
Email: [zqyan@szbl.ac.cn](mailto:zqyan@szbl.ac.cn)

### This PDF file includes:

Figures S1 to S18  
SI References

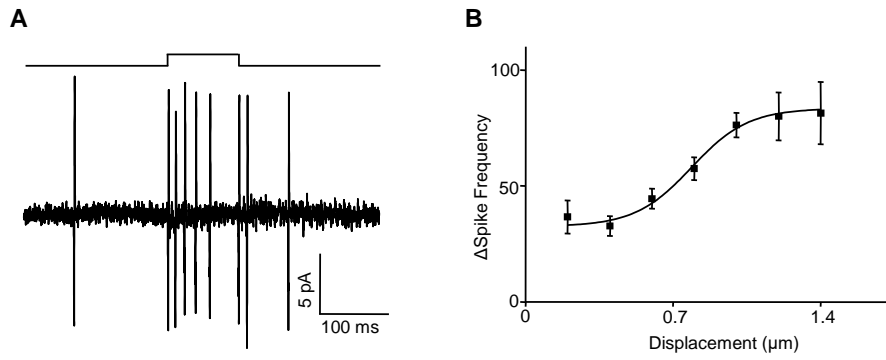

**Fig. S1.** Lch1 neurons respond to mechanical stimuli with action potential firings. (A) Touching the dendrite tip of a lch1 neuron with a 1  $\mu\text{m}$  displacement induced a burst of action potentials. (B) Summary of action potential firings of lch1 neurons in response to progressively greater mechanical stimuli.  $\Delta\text{Spike Frequency}$ : increase in the frequency of action potentials after stimulus onset compared to 100 ms before stimulus onset ( $n = 6, 11, 11, 8, 8, 6, 7$ ). The displacements were from 0.2  $\mu\text{m}$  to 1.4  $\mu\text{m}$  with 0.2  $\mu\text{m}$  increments. Error bars, mean  $\pm$  SEM.

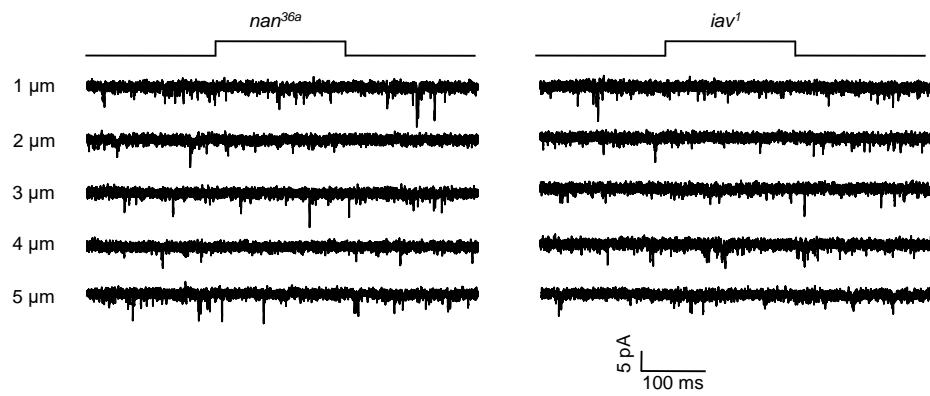

**Fig. S2.** No mechanical stimuli-induced currents are detected in Lch1 neurons of *nan* and *iav* mutants in response to increasing stimuli. Lch1 neurons were held at -60 mV. *nan<sup>36a</sup>*, *Nanchung* null mutant; *iav<sup>1</sup>*, *Inactive* null mutant. 1  $\mu$ m, 2  $\mu$ m, 3  $\mu$ m, 4  $\mu$ m, and 5  $\mu$ m represent the displacements of mechanical stimuli. Genotypes are as follows: for *iav<sup>1</sup>*: *iav<sup>1</sup>/y*; *lav-Gal4/+*; *UAS-CD8-GFP/+*. For *nan<sup>36a</sup>*: *lav-Gal4/UAS-GFP*; *nan<sup>36a</sup>/nan<sup>36a</sup>*.

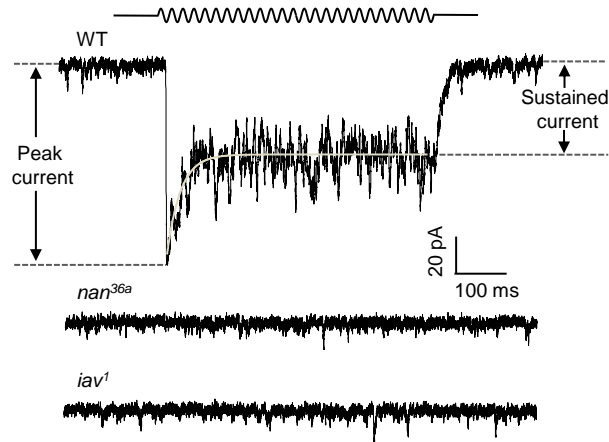

**Fig. S3.** Sound-induced currents in Cho neurons. Representative traces of current responses to a 500Hz 90 dB pure tone sound stimulation in wild-type and *nan<sup>36a</sup>*, *iav<sup>1</sup>* mutants. Lch1 neurons were held at -60 mV. The sound-elicited transduction current is similar to those recorded from locust auditory receptor neurons in a previous study (1). The grey line overlying the trace represents a single exponential fit of adaptation of the sound-induced current.

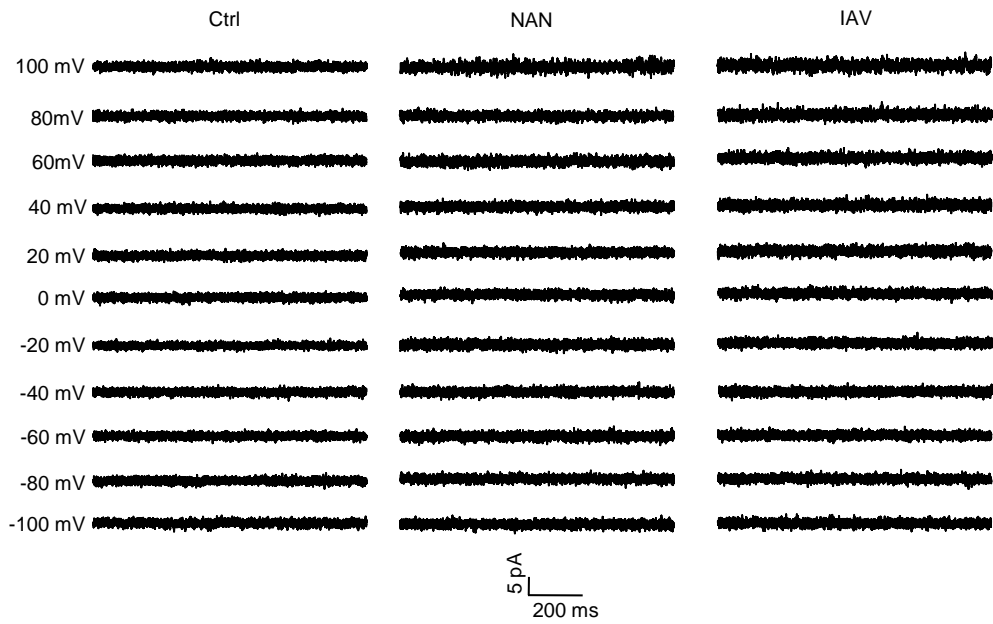

**Fig. S4.** Representative traces of single channel activities in control, NAN and IAV transfected S2 cells. S2 cells were clamped at potentials ranging from -100 to +100 mV (holding potentials) with 20 mV increments and recorded with a K<sup>+</sup>-based internal solution and a Na<sup>+</sup>-based extracellular solution. Ctrl, nontransfected S2 cells; NAN, S2 cells transfected with NAN-Flag; IAV, S2 cells transfected with IAV-mCherry.

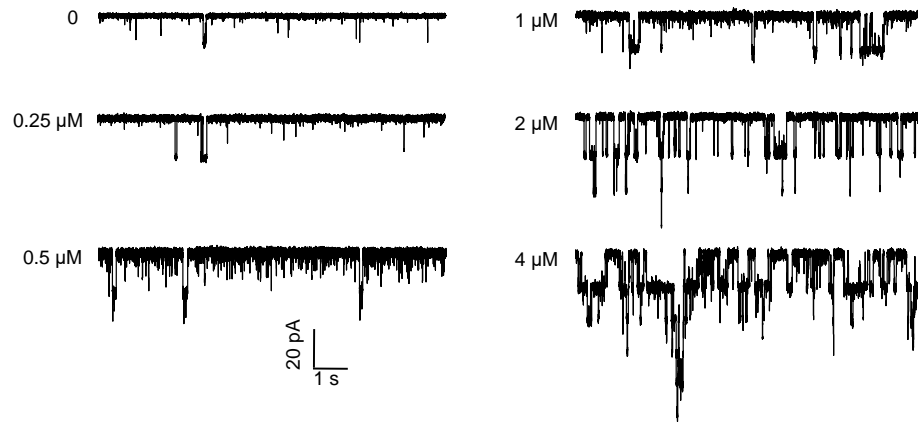

**Fig. S5.** Representative traces of single channel activities in Inactive-mCherry- and Nanchung-Flag-coexpressing S2 cells with or without NAM. The concentrations of nicotinamide (NAM) in the K<sup>+</sup>-based pipette solution during the whole-cell recordings were 0, 0.25 μM, 0.5 μM, 1 μM, 2 μM, and 4 μM. The holding potential was -60 mV.

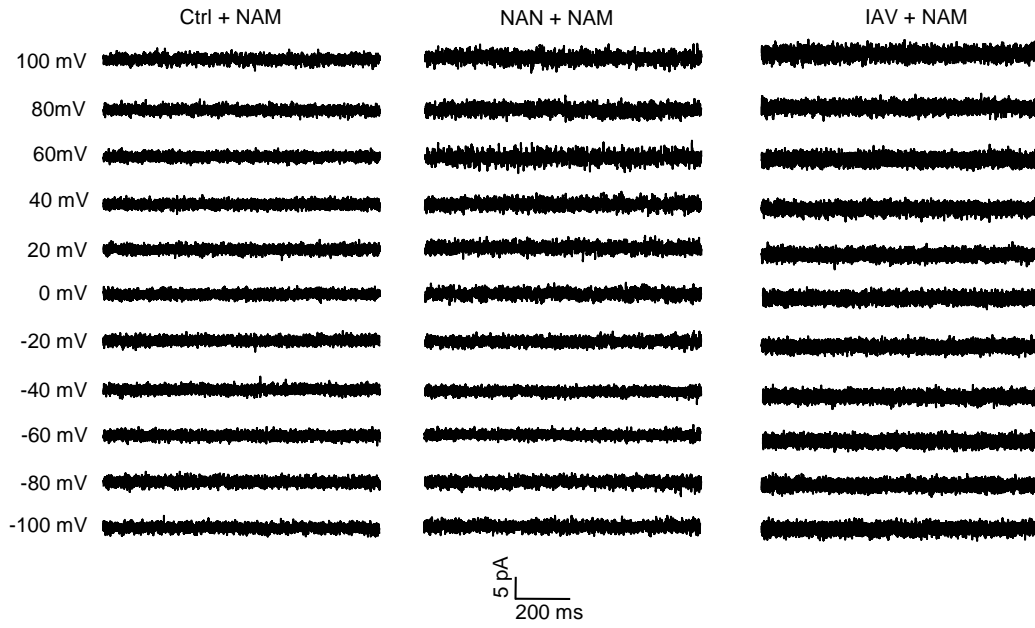

**Fig. S6.** Representative traces of single channel activities in empty, NAN and IAV transfected S2 cells with NAM. S2 cells were clamped at potentials ranging from -100 to +100 mV (holding potential). Ctrl+NAM, nontransfected S2 cells; NAN+NAM, S2 cells transfected with NAN-Flag; IAV+NAM, S2 cells transfected with IAV-mCherry. All the K<sup>+</sup>-based pipette solutions contained 2  $\mu$ M NAM.

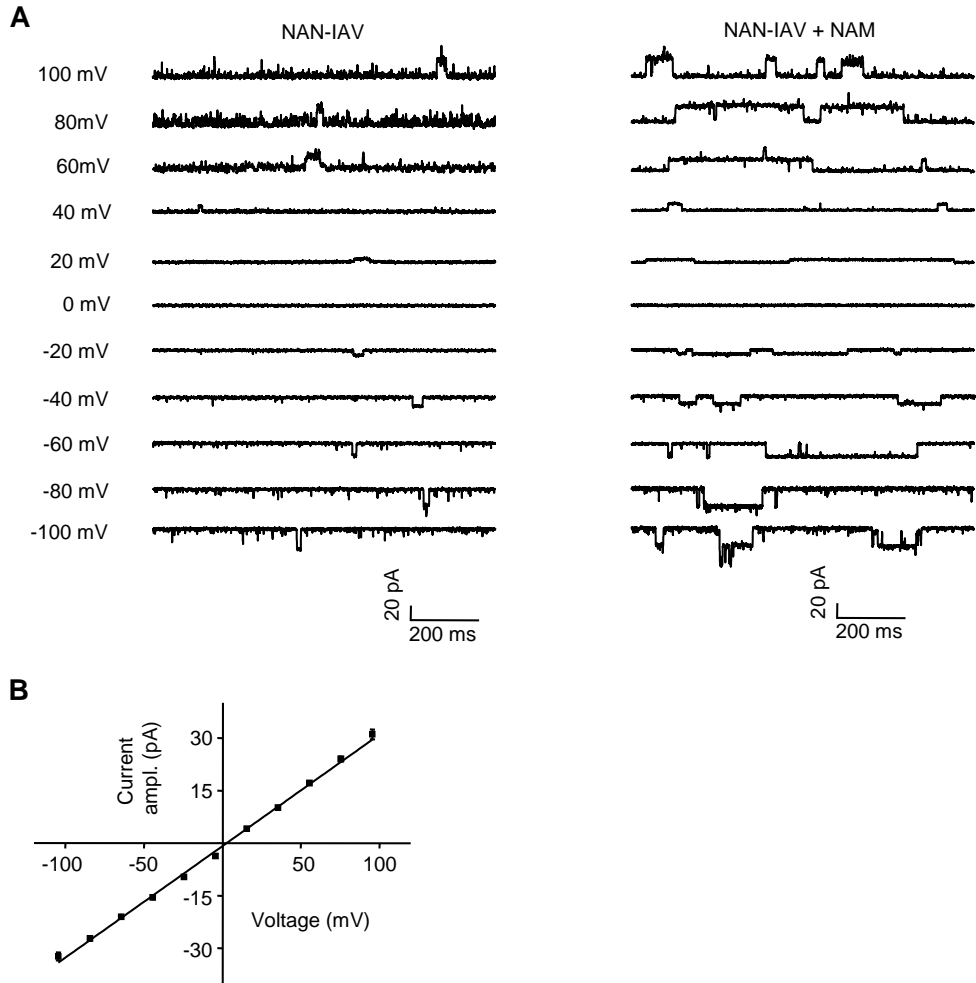

**Fig. S7.** NAN-IAV single channel activities with voltage steps in S2 cells. (A) Single channel current traces of NAN-IAV with voltage steps in the extracellular  $\text{Na}^+$ / intracellular  $\text{K}^+$  condition. NAN-IAV, spontaneous single channel activity in normal  $\text{Na}^+/\text{K}^+$  solution; NAN-IAV+NAM, active single channel current with  $2 \mu\text{M}$  NAM in internal solution. Cells were clamped at potentials ranging from  $-100$  to  $+100$  mV (holding potential). (B) I-V curves of NAN-IAV single channel currents in  $\text{Na}^+/\text{K}^+$  conditions with  $2 \mu\text{M}$  NAM in pipette solution ( $n = 5$ ). Error bars, mean  $\pm$  SEM. The liquid junction potential was  $+4.5$  mV; the holding potentials were from  $-100$  mV to  $+100$  mV; the membrane potentials (X axis) were from  $-104.5$  mV to  $+95.5$  mV with  $20$  mV increments.



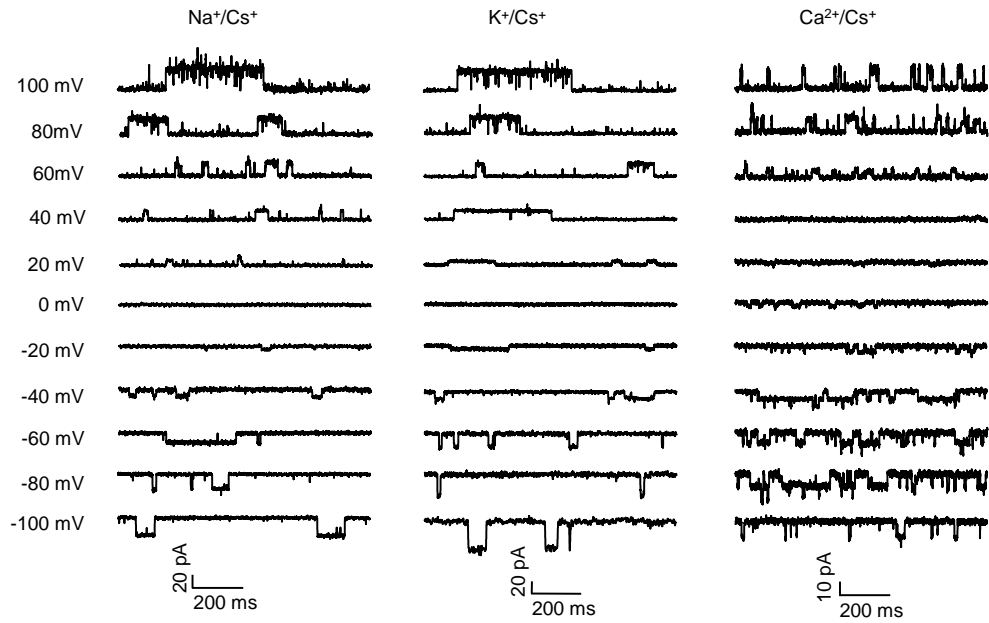

**Fig. S8.** Single channel current traces of NAN-IAV with voltage steps in bi-ionic conditions in S2 cells. S2 cells were clamped at potentials ranging from -100 to +100 mV (holding potentials).  $\text{Na}^+/\text{Cs}^+$ , extracellular  $\text{Na}^+/\text{intracellular Cs}^+$ ;  $\text{K}^+/\text{Cs}^+$ , extracellular  $\text{K}^+/\text{intracellular Cs}^+$ ;  $\text{Ca}^{2+}/\text{Cs}^+$ , extracellular  $\text{Ca}^{2+}/\text{intracellular Cs}^+$ . All the internal solutions contained 2  $\mu\text{M}$  NAM.

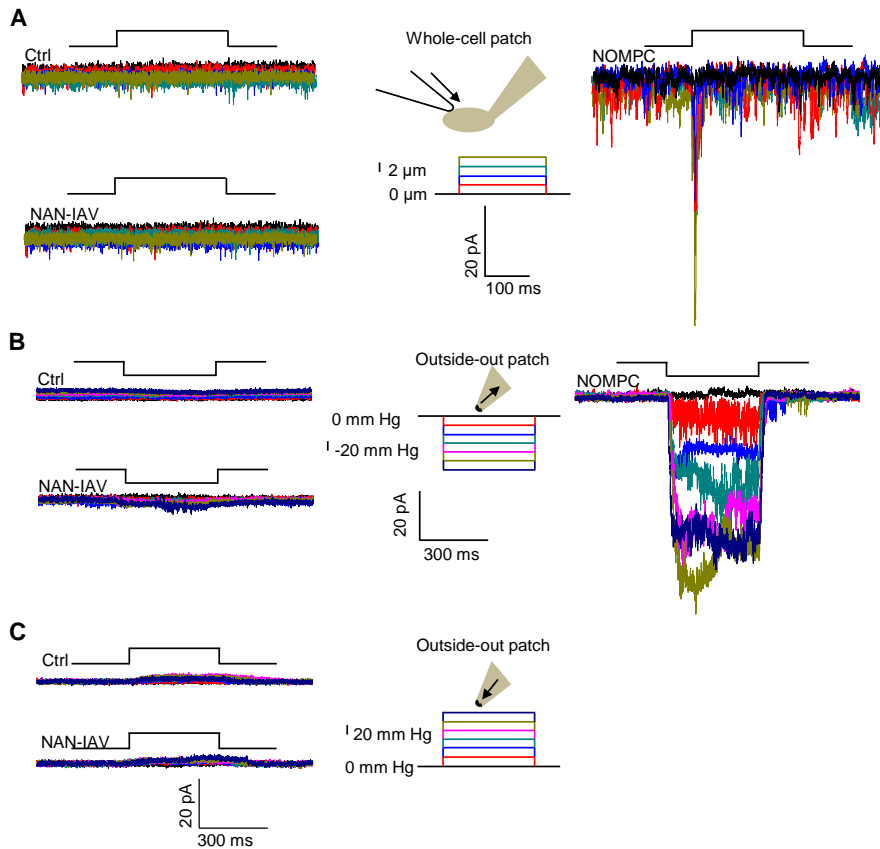

**Fig. S9.** Electrophysiological recordings of NAN-IAV or NOMPC in S2 cells. (A) Representative traces of control, NAN-IAV or NOMPC transfected S2 cells for whole-cell patch recordings in response to 2-8  $\mu\text{m}$  mechanical displacements. The black arrow denotes the direction of mechanical displacements. The holding potential is -60 mV. (B) Representative traces of control, NAN-IAV or NOMPC transfected S2 cells for outside-out patch recordings in response to -20– -120 mmHg negative pressure. The black arrow denotes negative pressure. The holding potential is -60 mV. (C) Representative traces of control, NAN-IAV or NOMPC transfected S2 cells for outside-out patch recordings in response to +20– +120 mmHg positive pressure. The black arrow denotes negative pressure. The holding potential is -60 mV.

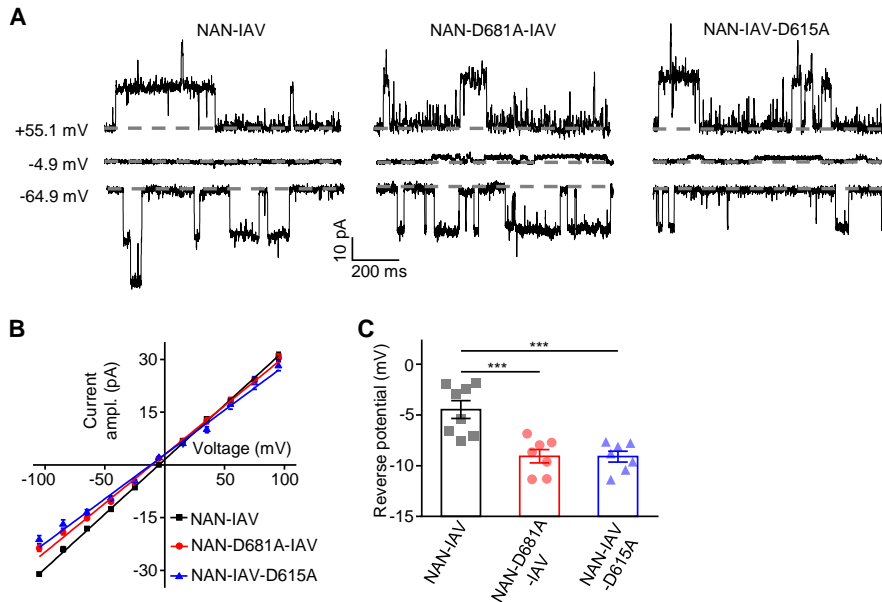

**Fig. S10.** Point mutations of NAN and IAV in selective filter region altered the reversal potential of NAN-IAV channels in S2 cells. (A) Representative traces of single channel activities in wild-type and mutant NAN-IAV channels at -60 mV (holding potential) in  $\text{Na}^+/\text{Cs}^+$ -based solutions with  $2 \mu\text{M}$  nicotinamide (NAM) in internal solution. Gray dashed lines denote the closed states of single channel. The liquid junction potential is +4.9 mV; the holding potentials are -60 mV, 0 mV, +60 mV; the membrane potentials are -64.9 mV, -4.9 mV, +55.1 mV. (B) Average current-voltage relationship of wild-type and mutant NAN-IAV single channel currents in  $\text{Na}^+/\text{Cs}^+$ -based solutions with NAM ( $n = 8, 7, 7$ ; mean  $\pm$  SEM). The liquid junction potential is +4.9 mV; the holding potentials are from -100 mV to +100 mV; the membrane potentials (X axis) are from -104.9 mV to +95.1 mV with 20 mV increments. NAN-D681A-IAV, S2 cells transfected with NAN-D681A-Flag and IAV-mCherry; NAN-IAV-D615A, S2 cells transfected with NAN-Flag and IAV-D615A-mCherry. (C) Summary of reversal potentials of single channel currents of wild-type and point mutant NAN-IAV in S2 cells ( $n = 8, 7, 7$ ; mean  $\pm$  SEM). One-way analysis of variance followed by Holm-Sidak post hoc analysis was used for comparison among multiple groups. \*\*\* $p < 0.001$ .



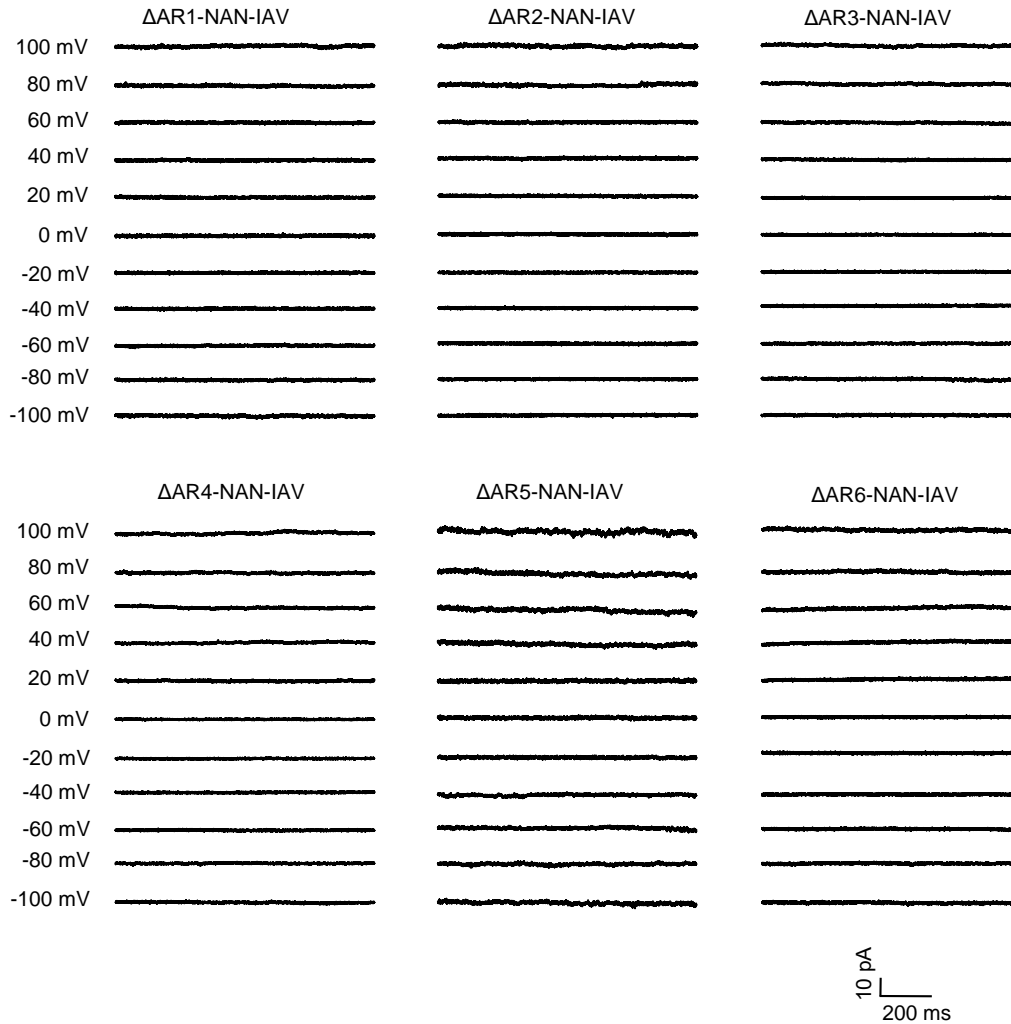

**Fig. S12.** Representative traces of single channel activities in truncated NAN transfected S2 cells. S2 cells were recorded at holding potentials ranging from -100 to +100 mV with 20 mV increments in Na<sup>+</sup>/K<sup>+</sup>-based solutions. ΔAR, deletion of ankyrin repeats; ΔAR1-NAN-IAV, S2 cells transfected with ΔAR1-NAN-Flag and IAV-mCherry; ΔAR2-NAN-IAV, S2 cells transfected with ΔAR2-NAN-Flag and IAV-mCherry; ΔAR3-NAN-IAV, S2 cells transfected with ΔAR3-NAN-Flag and IAV-mCherry; ΔAR4-NAN-IAV, S2 cells transfected with ΔAR4-NAN-Flag and IAV-mCherry; ΔAR5-NAN-IAV, S2 cells transfected with ΔAR5-NAN-Flag and IAV-mCherry; ΔAR6-NAN-IAV, S2 cells transfected with ΔAR6-Cherry. All the pipette solutions contained 2 μM NAM.

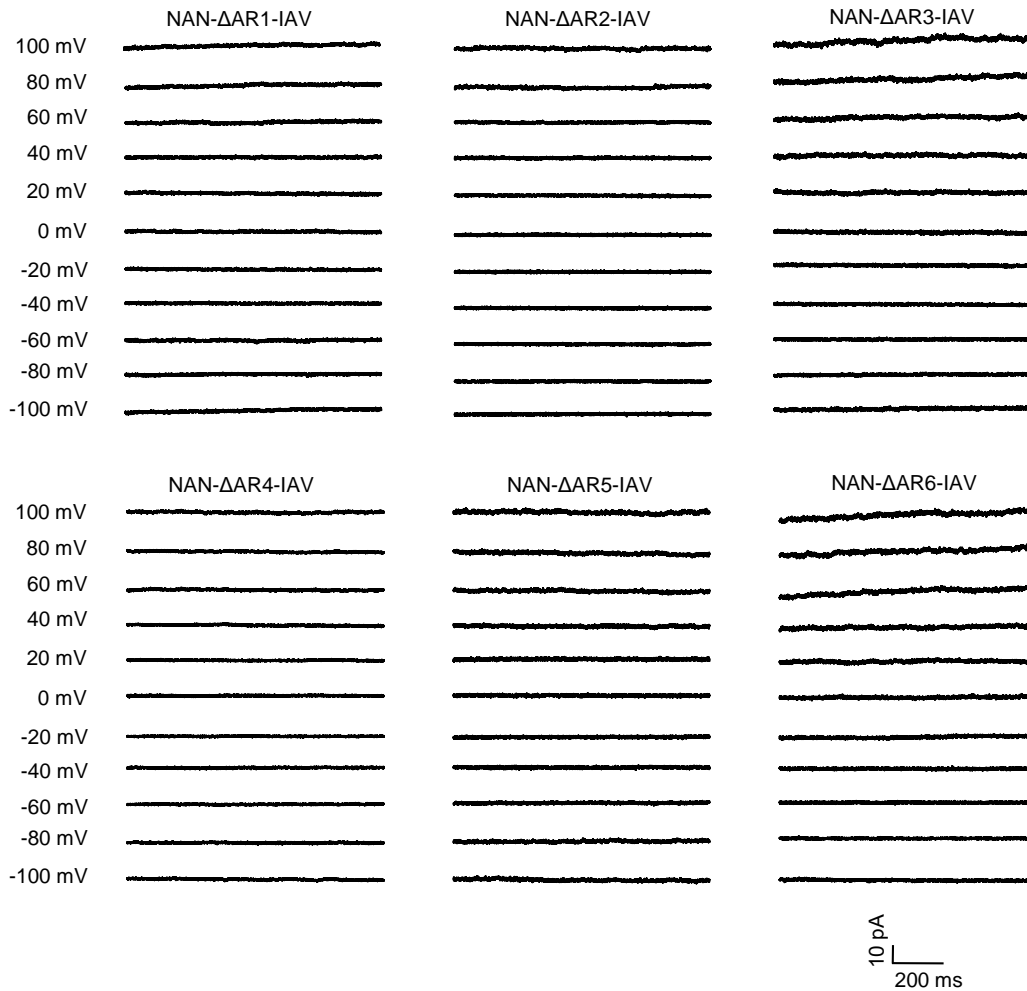

**Fig. S13.** Representative traces of single channel activities in truncated IAV transfected S2 cells. S2 cells were clamped at holding potentials ranging from -100 to +100 mV.  $\Delta$ AR, deletion of Ankyrin repeats; NAN- $\Delta$ AR1-IAV, S2 cells transfected with NAN-Flag and  $\Delta$ AR1-IAV-mCherry; NAN- $\Delta$ AR2-IAV, S2 cells transfected with NAN-Flag and IAV- $\Delta$ AR2-mCherry; NAN- $\Delta$ AR3-IAV, S2 cells transfected with NAN-Flag and IAV- $\Delta$ AR3-mCherry; NAN- $\Delta$ AR4-IAV, S2 cells transfected with NAN-Flag and IAV- $\Delta$ AR4-mCherry; NAN- $\Delta$ AR5-IAV, S2 cells transfected with NAN-Flag and IAV- $\Delta$ AR5-mCherry; NAN- $\Delta$ AR6-IAV, S2 cells transfected with NAN-Flag and IAV- $\Delta$ AR6-mCherry. All of the K<sup>+</sup>-based pipette solutions contained 2  $\mu$ M NAM.

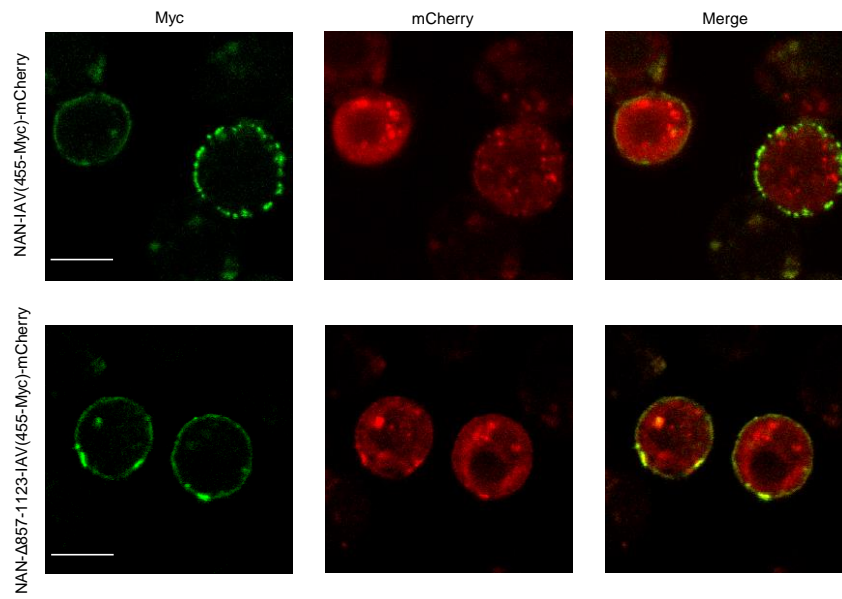

**Fig. S14.** Immunostaining of S2 cells expressing NAN-IAV and NAN- $\Delta$ 857-1123-IAV. Representative images of myc staining in NAN-IAV-mCherry- and NAN- $\Delta$ 857-1123-IAV-mCherry-transfected S2 cells. Myc tags were inserted behind the Q455 residue of IAV. Scale bar, 10  $\mu$ m.

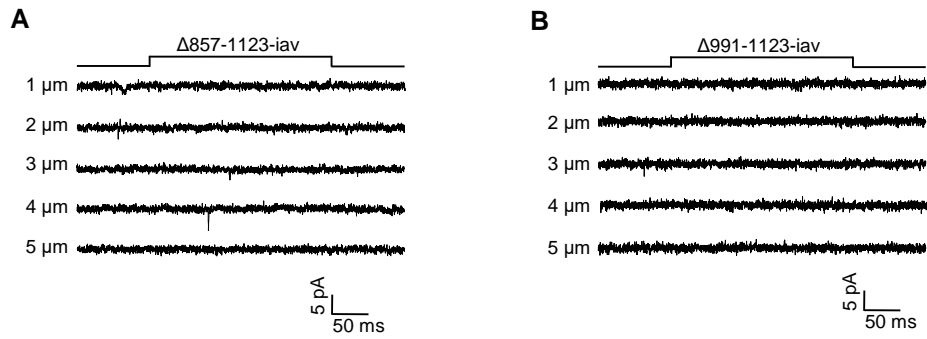

**Fig. S15.** No MET currents were detected in Lch1 neurons of two truncated mutants of *iav* in response to increasing stimuli. (A, B)  $\Delta 857$ -1123-*iav* and  $\Delta 991$ -1123-*iav* could not rescue the MET currents of *iav*<sup>1</sup>. Lch1 neurons were clamped at -60 mV (holding potential) in Na<sup>+</sup>/K<sup>+</sup>-based solutions. Values of 1  $\mu$ m, 2  $\mu$ m, 3  $\mu$ m, 4  $\mu$ m, and 5  $\mu$ m represent the displacements of mechanical stimuli. Genotypes are as follows: for A,  $\Delta 857$ -1123-*iav*: *iav*<sup>1</sup>/*y*; *lav*-Gal4/+; UAS- $\Delta 857$ -1123-*iav*-GFP/+. For B,  $\Delta 991$ -1123-*iav*: *iav*<sup>1</sup>/*y*; *lav*-Gal4/+; UAS- $\Delta 991$ -1123-*iav*-GFP/+.



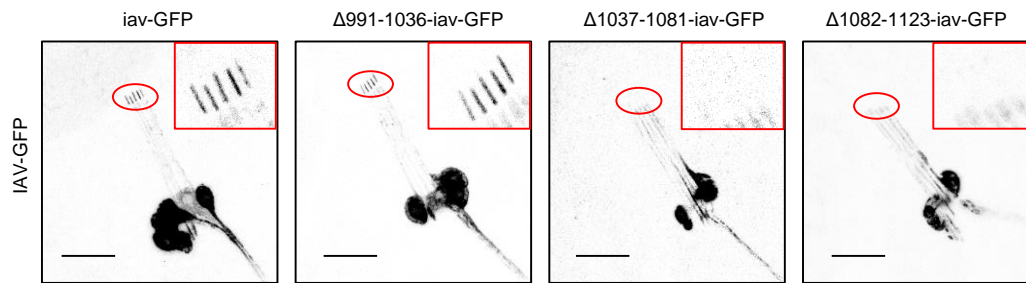

**Fig. S16.** Localization of wild-type and mutant forms of IAV in ICh5 neurons of *iav*<sup>1</sup> mutant larvae. Expression of GFP-tagged constructs were driven by *lav*-Gal4 driver. Scale bar, 20  $\mu$ m. Genotypes are as follows: *iav*-GFP: *iav*<sup>1</sup>/*y*; *lav*-Gal4/+; UAS-*iav*-GFP/+.  $\Delta$ 991-1036-*iav*-GFP: *iav*<sup>1</sup>/*y*; *lav*-Gal4/+; UAS- $\Delta$ 991-1036-*iav*-GFP/+.  $\Delta$ 1037-1081-*iav*-GFP: *iav*<sup>1</sup>/*y*; *lav*-Gal4/+; UAS- $\Delta$ 1037-1081-*iav*-GFP/+.  $\Delta$ 1082-1123-*iav*-GFP: *iav*<sup>1</sup>/*y*; *lav*-Gal4/+; UAS- $\Delta$ 1082-1123-*iav*-GFP/+.

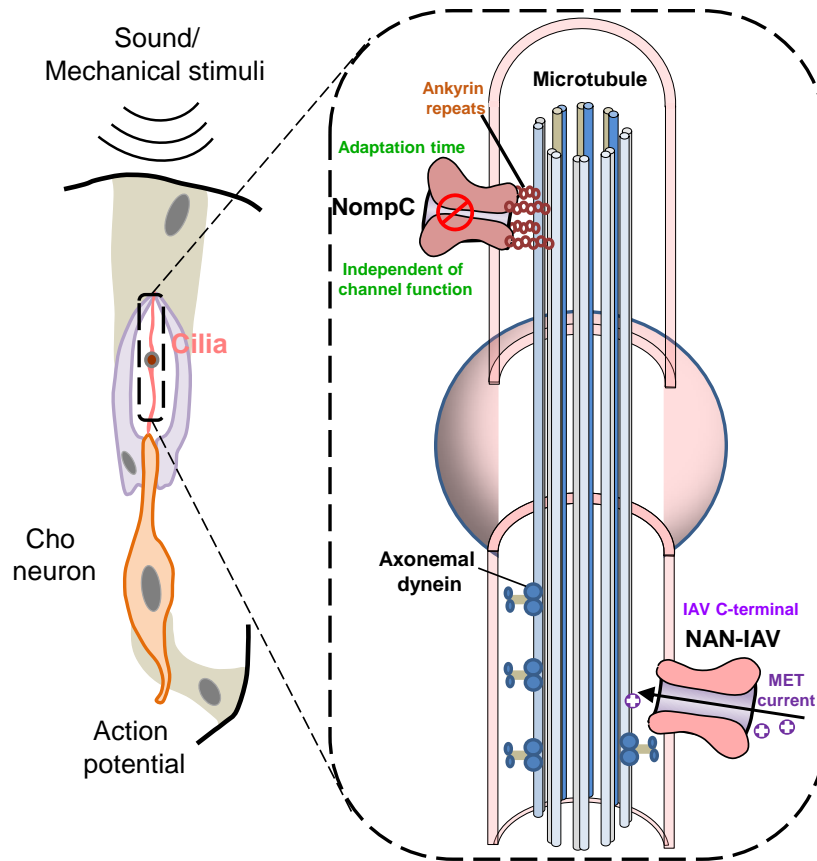

**Fig. S17.** A schematic of auditory transduction in *Drosophila* larval Cho neurons. At the tip of the dendrite, each Cho neuron bears a cilium (Left), which displays an axoneme containing microtubular doublets and dynein arm-like protrusions (Right). Nanchung and Inactive are localized to the proximal cilia, while NompC has a restricted distribution in the distal cilia (Right).

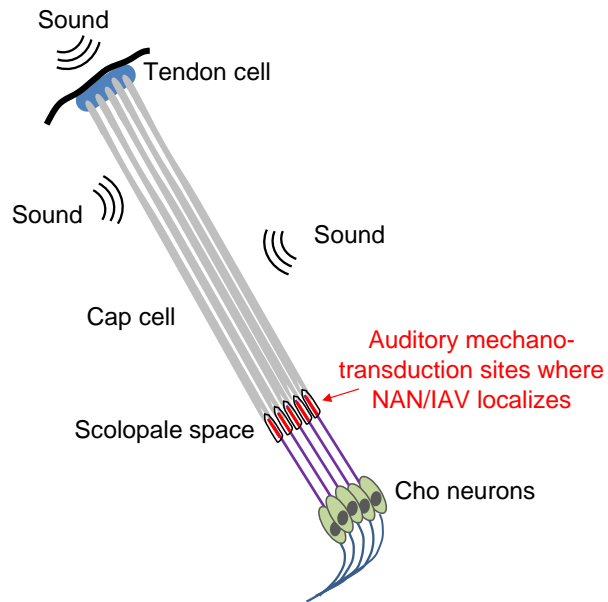

**Fig. S18.** The scolopidia structure of *Drosophila* auditory organs. The illustration of chordotonal organs was adapted from a previous study (2). Adapted by permission from Springer Nature Customer Service Centre GmbH: Springer Nature, Neuroscience Bulletin; Axonemal Dynein DNAH5 is Required for Sound Sensation in *Drosophila* Larvae. Li B, Li S, Yan Z, © 2021. The cilia of Cho neurons, where auditory transduction take place, are surrounded with scolopale space, and the ciliary tips project into cap cells, which are attached to the cuticles through tendon cells.

## SI References

1. B. Warren, T. Matheson, The Role of the Mechanotransduction Ion Channel Candidate Nanchung-Inactive in Auditory Transduction in an Insect Ear. *J. Neurosci.* **38**, 3741-3752 (2018).
2. B. Li, S. Li, Z. Yan, Axonemal Dynein DNAH5 is Required for Sound Sensation in Drosophila Larvae. *Neurosci. Bull.* **37**, 523-534 (2021).
